# Supplementary material for: TISIGNER.com: web services for improving recombinant protein production
Source: PubMed Central journal article supplement (PMC8265118; doi:10.1093/nar/gkab175), 2021-03-21
Supplement: gkab175_supplemental_file.pdf [file gkab175_supplemental_file.pdf]

## SUPPLEMENTARY MATERIALS

**Table S1.** Performance metrics of TIsigner and SoDoPE (1, 2).

| Tool (approach)                    | Dataset, host (references)                        | Type       | Sample size                          | Spearman's correlation              | AUROC |
|------------------------------------|---------------------------------------------------|------------|--------------------------------------|-------------------------------------|-------|
| TIsigner (mRNA accessibility)      | GFP reporter, <i>Escherichia coli</i> (3)         | Continuous | 14,425                               | -0.65 <sup>a</sup>                  | N/A   |
|                                    | YFP reporter, <i>Saccharomyces cerevisiae</i> (4) | Continuous | 2,041                                | -0.55 <sup>a</sup>                  | N/A   |
|                                    | GFP reporter, <i>Mus musculus</i> (5)             | Continuous | 65,536                               | -0.28 <sup>a</sup>                  | N/A   |
|                                    | PSI:Biology, <i>E. coli</i> (6)                   | Binary     | 8,780 expressed, 2,650 non-expressed | N/A                                 | 0.70  |
| SoDoPE (Solubility-Weighted Index) | Training set: PSI:Biology, <i>E. coli</i> (6)     | Binary     | 8,238 soluble, 3,978 insoluble       | N/A                                 | 0.71  |
|                                    | Independent test set: eSOL, <i>E. coli</i> (7)    | Continuous | 3,198                                | 0.50 (P=9.46 × 10 <sup>-206</sup> ) | N/A   |

**Table S2.** Performance metrics of Razor (8).

| Classifier    | Dataset (references)             | Sample size                          | MCC   | AUROC | AUPRC | Cleavage site |        |
|---------------|----------------------------------|--------------------------------------|-------|-------|-------|---------------|--------|
|               |                                  |                                      |       |       |       | Precision     | Recall |
| Eukaryotic SP | SignalP 5.0 benchmarking set (9) | 211 SPs, 7,246 non-SPs               | 0.815 | 0.98  | 0.85  | 0.565         | 0.597  |
|               | Independent test set             | 287 SPs, 52,055 non-SPs              | 0.405 | 0.96  | 0.61  | 0.136         | 0.596  |
| Toxin SP      | Training set (10, 11)            | 261 toxin SPs, 1,738 non-toxin SPs   | 0.741 | 0.89  | 0.74  | N/A           | N/A    |
|               | Independent test set (10, 11)    | 47 toxin SPs, 194 non-toxin SPs      | 0.769 | 0.98  | 0.93  | N/A           | N/A    |
| Fungal SP     | Training set (11)                | 121 fungal SPs, 1,843 non-fungal SPs | 0.506 | 0.87  | 0.48  | N/A           | N/A    |
|               | Independent test set (11)        | 18 fungal SPs, 269 non-fungal SPs    | 0.60  | 0.94  | 0.75  | N/A           | N/A    |

<sup>a</sup> P-value below machine's underflow level.

AUROC and AUPRC, areas under the receiver operating characteristic curve and precision-recall curve, respectively; GFP, green fluorescent protein, MCC, Matthew's correlation coefficient, PSI:Biology, Protein Structure Initiative: Biology; YFP, yellow fluorescent protein.

## References

1. Bhandari,B.K., Lim,C.S. and Gardner,P.P. (2021) Protein yield is tunable by synonymous codon changes of translation initiation sites. *bioRxiv*, doi:10.1101/726752.
2. Bhandari,B.K., Gardner,P.P. and Lim,C.S. (2020) Solubility-Weighted Index: fast and accurate prediction of protein solubility. *Bioinformatics*, **36**, 4691–4698.
3. Cambray,G., Guimaraes,J.C. and Arkin,A.P. (2018) Evaluation of 244,000 synthetic sequences reveals design principles to optimize translation in *Escherichia coli*. *Nat. Biotechnol.*, **36**, 1005–1015.
4. Dvir,S., Velten,L., Sharon,E., Zeevi,D., Carey,L.B., Weinberger,A. and Segal,E. (2013) Deciphering the rules by which 5'-UTR sequences affect protein expression in yeast. *Proc. Natl. Acad. Sci. U. S. A.*, **110**, E2792–801.
5. Noderer,W.L., Flockhart,R.J., Bhaduri,A., Diaz de Arce,A.J., Zhang,J., Khavari,P.A. and Wang,C.L. (2014) Quantitative analysis of mammalian translation initiation sites by FACS-seq. *Mol. Syst. Biol.*, **10**, 748.
6. Seiler,C.Y., Park,J.G., Sharma,A., Hunter,P., Surapaneni,P., Sedillo,C., Field,J., Algar,R., Price,A., Steel,J., *et al.* (2014) DNASU plasmid and PSI:Biological-Materials repositories: resources to accelerate biological research. *Nucleic Acids Res.*, **42**, D1253–60.
7. Niwa,T., Ying,B.-W., Saito,K., Jin,W., Takada,S., Ueda,T. and Taguchi,H. (2009) Bimodal protein solubility distribution revealed by an aggregation analysis of the entire ensemble of *Escherichia coli* proteins. *Proc. Natl. Acad. Sci. U. S. A.*, **106**, 4201–4206.
8. Bhandari,B.K., Gardner,P.P. and Lim,C.S. (2021) Razor: annotation of signal peptides from toxins. *bioRxiv*, doi:10.1101/2020.11.30.405613.
9. Almagro Armenteros,J.J., Tsirigos,K.D., Sønderby,C.K., Petersen,T.N., Winther,O., Brunak,S., von Heijne,G. and Nielsen,H. (2019) SignalP 5.0 improves signal peptide predictions using deep neural networks. *Nat. Biotechnol.*, **37**, 420–423.
10. Jungo,F., Bougueleret,L., Xenarios,I. and Poux,S. (2012) The UniProtKB/Swiss-Prot Tox-Prot program: A central hub of integrated venom protein data. *Toxicon*, **60**, 551–557.
11. UniProt Consortium (2019) UniProt: a worldwide hub of protein knowledge. *Nucleic Acids Res.*, **47**, D506–D515.
